# At seeming safe concentrations, synergistic effects of PM<sub>2.5</sub> and formaldehyde co-exposure induces Alzheimer-like changes in mouse brain

Xudong Liu<sup>1,2,\*</sup>, Yuchao Zhang<sup>2,\*</sup>, Chen Luo<sup>1</sup>, Jun Kang<sup>1</sup>, Jinquan Li<sup>1,4</sup>, Kun Wang<sup>4</sup>, Ping Ma<sup>3</sup> and Xu Yang<sup>1</sup>

<sup>1</sup>Laboratory of Environmental Biomedicine, Hubei Key Laboratory of Genetic Regulation and Integrative Biology, College of Life Science, Central China Normal University, Wuhan, China

<sup>2</sup>Department of Food science and Engineering, Moutai College, Renhuai, China

<sup>3</sup>Research Center of Basic Medical Sciences, School of Basic Medical Sciences, Hubei University of Science and Technology, Xianning, China

<sup>4</sup>New York University School of Medicine, Tuxedo, New York, United States of America

\*These authors have contributed equally to this work

**Correspondence to:** Xu Yang, **email:** yangxu@mail.ccnu.edu.cn  
Ping Ma, **email:** mping68@126.com

**Keywords:** Alzheimer's disease; air pollution; co-exposure; oxidative stress; inflammation

**Received:** June 08, 2017

**Accepted:** August 26, 2017

**Published:** October 06, 2017

**Copyright:** Liu et al. This is an open-access article distributed under the terms of the Creative Commons Attribution License 3.0 (CC BY 3.0), which permits unrestricted use, distribution, and reproduction in any medium, provided the original author and source are credited.

## ABSTRACT

**Alzheimer's disease (AD) is a serious, common, global disease, yet its etiology and pathogenesis are incompletely understood. Air pollution is a multi-pollutants co-exposure system, which may affect brain. The indoor environment is where exposure to both air particulate matter (<2.5 μm in diameter) (PM<sub>2.5</sub>) and formaldehyde (FA) can occur simultaneously. Whether exposure to such a multi-pollutant (PM<sub>2.5</sub> plus FA) mixture contributes to the development of AD, and whether there is a difference between exposure to PM<sub>2.5</sub> or FA alone needs to be investigated. To determine the objective, C57BL/6J mice were exposed daily to PM<sub>2.5</sub> (0.193 mg/Kg/day), FA (0.155 mg/Kg/day) or multi-pollutants (0.193 mg/Kg/day PM<sub>2.5</sub> plus 0.155 mg/Kg/day FA) for one week. AD-like changes and upstream events were investigated after exposure. The results showed that exposure to PM<sub>2.5</sub> or FA alone in this study had little or no adverse effects on the mouse brain. However, some AD-like pathologies were detected after multi-pollutants co-exposure. This work suggested PM<sub>2.5</sub> plus FA co-exposure has more potential to induce AD-like pathologies than exposure alone. Oxidative stress and inflammation may be involved into the toxic mechanisms. Synergistic effects of co-exposure may induce the hygienic or safety standards of each pollutant not safe.**

## INTRODUCTION

Alzheimer's disease (AD) is a serious, common, global disease, yet its etiology and pathogenesis remain incompletely understood. Many factors have been reported to contribute to the etiology of AD, such as genetic factors, environmental factors and human lifestyle patterns [1–5].

Air pollution is a multifaceted environmental toxin, comprising particulate matter (PM), gases, organic compounds and metals, and is present in indoor and outdoor air [6]. Recently, increasing evidence suggests that exposure to air pollution not only harms the human heart and lungs, but it may also affect the brain [7].

Different countries or organizations have their own atmospheric environment safe, quality or hygienic

standards. In our daily life, people usually consider that when we exposure to certain pollutant at its standard even slightly higher than the standard has zero or minor adverse effects. Actually, we have a mistake, the safe standard developed generally according to scientific researches which the pollutant exposure alone. In fact, environmental toxin exposure is a multi-pollutants co-exposure system, for example air pollution.

Air particulate matter (<2.5  $\mu\text{m}$  in diameter) ( $\text{PM}_{2.5}$ ) and formaldehyde (FA) are considered as one of the most important outdoor and indoor air pollutant respectively. The co-exposure of them seems to be impossible, while outdoor  $\text{PM}_{2.5}$  can enter buildings by infiltration and ventilation. Add the indoor source  $\text{PM}_{2.5}$ , the concentration of indoor  $\text{PM}_{2.5}$  tends to be the same as outdoor's, and in some cases may be even higher [8]. Since people typically spend more than 90% of their time indoors [9], extended co-exposure to  $\text{PM}_{2.5}$  and FA at indoor is highly likely.

Although epidemiological studies have shown that there is a correlation between exposure to certain specific air pollutants and the occurrence of AD, evaluating the risk of AD after co-exposure to multi-pollutants has not been extensively studied. The aims of this study are: (1) identify whether there are differences in the development of AD due to exposure to  $\text{PM}_{2.5}$ , FA or a multi-pollutant ( $\text{PM}_{2.5}$  plus FA); (2) explore the possible mechanisms of the effects.

## RESULTS

### Components found in $\text{PM}_{2.5}$ samples

Table 1 shows the results of elements analysis. A total of elements were identified as well as element carbon (EC) and organic carbon (OC). Table 2 shows concentrations of water soluble components in the samples. Table 3 shows the results of the PAHs analysis. A total of 16 PAHs was identified.

### Cognitive deficits in mice after $\text{PM}_{2.5}$ , FA or multi-pollutant exposure

After 5 days of training, each of the exposure group mice exhibited a reduction in escape latency (EL) (Figure 1A). However, the mice that were exposed to multi-pollutant had significantly slower decrease. So the average escape latency for 5 days of co-exposure group was higher than control group (Figure 1B). On the seventh day, the time that mouse stayed in the platform quadrant (SE quadrant) was remarkably short for the mice that received co-exposure (Figure 1C). Looking at the swimming routes of the mice on the seventh day, it can be seen that the routes of the control,  $\text{PM}_{2.5}$ , and FA groups were primarily in the platform quadrant, while the

routes of co-exposure group were irregular and showed no purpose (Figure 1D).

### Effects of $\text{PM}_{2.5}$ , FA or multi-pollutant exposure on blood-brain barrier (BBB) permeability

An increase in Evans Blue (EB) stain accumulation was not seen in the brains of mice that were exposed to  $\text{PM}_{2.5}$  or FA alone, while accumulation was seen in the co-exposed mice. Depletion of Zonula occludens-1 (ZO-1) was also detected in the mice in the co-exposure group (Figure 2).

### Histopathological alterations of mice brains after $\text{PM}_{2.5}$ , FA or multi-pollutant exposure

After exposure, hippocampus, olfactory bulb, cerebral cortex and prefrontal cortex were examined. In Figure 3A the results showed that the pyramidal cells of the hippocampus  $\text{CA}_1$  region of control group are neatly aligned, the cells have clear edges are polygonal in shape, and the apical dendrites are clearly visible. Exposure to  $\text{PM}_{2.5}$  or FA induced zero or minor pathological alterations, while co-exposure induced cell arrangement loosening. Figure 3B shows the olfactory bulb changes after exposure, the structure of the synaptic glomerulus in the olfactory bulb of control group was integrated and arranged in a tidy manner. With co-exposure, the circular structure of the synaptic glomerulus was destroyed. Figure 3C & 3D shows histopathological changes in the cerebral cortex and prefrontal cortex after exposure. Compared with the control groups the cell morphology did not change significantly. However, co-exposure resulted in a decrease in cell numbers in the cerebral cortex and prefrontal cortex (Table 4).

### Nissl substance decreased in the mouse brain after $\text{PM}_{2.5}$ , FA or multi-pollutant exposure

Nissl staining of the hippocampus after exposure is shown in Figure 3E, and clearly demonstrates the normal morphology and clear cytoplasmic staining of cells in control animals, and the down-regulation of nissl substance was did by co-exposure (Table 5).

### Exposure to $\text{PM}_{2.5}$ , FA or multi-pollutant increased beta-amyloid plaques 1-42 ( $\text{A}\beta_{1-42}$ ) and hyper-phosphorylated tau (Tau-P) levels in mice brains

After exposure, neuronal accumulation of  $\text{A}\beta_{1-42}$  was found to be present in the cerebral cortex of co-exposure group (Figure 4A & 4B),  $\text{PM}_{2.5}$  or FA exposure alone did not change the expression of  $\text{A}\beta_{1-42}$  (Table 6). The expression of Tau-P in the cerebral cortex (Figure

**Table 1: Concentration (mg/Kg) of elements in PM<sub>2.5</sub>**

| Element | Concentration        | Element | Concentration        |
|---------|----------------------|---------|----------------------|
| Al      | 2.09×10 <sup>3</sup> | As      | 738                  |
| Cr      | 4.36                 | Cu      | 7.40                 |
| Fe      | 1.35×10 <sup>3</sup> | Mn      | 42.4                 |
| Ni      | 0.934                | Pb      | 8.25                 |
| Sb      | 16.9                 | Zn      | 4.08×10 <sup>3</sup> |
| Ca      | 1.67×10 <sup>4</sup> | K       | 1.94×10 <sup>3</sup> |
| Mg      | 5.28×10 <sup>3</sup> | Na      | 5.72×10 <sup>3</sup> |
| Si      | 4.23×10 <sup>4</sup> | EC      | 1.35×10 <sup>4</sup> |
| OC      | 1.17×10 <sup>5</sup> |         |                      |

EC: element carbon; OC: organic carbon.

**Table 2: Concentration (mg/Kg) of water soluble components in PM<sub>2.5</sub>**

| Element                      | Concentration | Element                       | Concentration        |
|------------------------------|---------------|-------------------------------|----------------------|
| Cl <sup>-</sup>              | 552           | SO <sub>4</sub> <sup>2-</sup> | 1.25×10 <sup>4</sup> |
| NO <sub>3</sub> <sup>-</sup> | 386           | NH <sub>4</sub> <sup>+</sup>  | 646                  |

**Table 3: Concentration (mg/Kg) of PAHs in PM<sub>2.5</sub>**

| Element                | Concentration | Element                  | Concentration |
|------------------------|---------------|--------------------------|---------------|
| Phenanthrene           | 0.47          | Anthracene               | 0.014         |
| Fluoranthene           | 1.43          | Pyrene                   | 1.28          |
| Benzo [a] anthracene   | 16.9          | Chrysene                 | 0.818         |
| Benzo [a] pyrene       | 0.463         | Benzo [k] fluoranthene   | 0.164         |
| Benzo [b] fluoranthene | 0.157         | Dibenzo [a,h] anthracene | 0.088         |
| Benzo [g,h,i] perylene | 0.325         | Indeno [1,2,3-cd] pyrene | 0.10          |
| Naphthalene            | 0.076         | Fluorene                 | 0.017         |

4C & 4D) after exposure was very similar to Aβ<sub>1-42</sub>. PM<sub>2.5</sub> or FA exposure alone did not change the expression of Tau-P, while after co-exposure, the expression of Tau-P in the cerebral cortex was observed to increase significantly (Table 6).

#### **Glia activation in the mouse brain after PM<sub>2.5</sub>, FA or multi-pollutant treatment**

As Figure 5A & 5B shows, in the control animals the microglia display a ramified morphology with small cell bodies and elongated cell neurites, all characteristic features of resting microglia. After co-exposure, Iba1-positive cell size increases, neurites retract and coarsen,

and some spines were found on the neurites. Significant changes in Iba1 levels were observed (Table 6).

Through Figure 5C & 5D, astrocyte activation can also be observed. In vehicle animals, the astrocytes presented their normal morphology with non hypertrophic cell bodies and a ramified pattern of their branches. After co-exposure, astrocytes were activated, this activation was characterized by increased cell body volume and branches became more ramified. In addition, expression of fibrillary acidic protein (GFAP) in the cerebral cortex increased significantly (Table 6). However, PM<sub>2.5</sub> or FA exposure alone did not induce microglia and astrocytes activation significantly.

**PM<sub>2.5</sub>, FA or multi-pollutant exposure exacerbates the oxidative stress (OS) and inflammation level in the mouse brain**

As Figure 6 shows, exposure to PM<sub>2.5</sub> or FA alone had no or only minor adverse effects on the levels of OS in the mouse brain. But co-exposure exacerbated OS. Significant increases in reactive oxygen species (ROS) levels (Figure 6A), and a marked decrease in glutathione (GSH) content and superoxide dismutase (SOD) activity were seen after co-exposure (Figure 6C & 6D). However, co-exposure not changed the levels of malondialdehyde (MDA) and 8-hydroxy-2-deoxyguanosine (8-OH-dG).

The expression levels of nuclear factor κB (NF-κB), tumor necrosis factor α (TNF-α), interleukin-1β (IL-1β), and Cyclooxygenase 2 (COX-2) were measured to reflect the inflammation level in the mouse

brain (Figure 7). PM<sub>2.5</sub> or FA exposure alone did not change these cytokines expression. In the co-exposure group, the synergistic effect of co-exposure on COX-2 expression was significant.

**DISCUSSION**

People usually consider that when we exposure to certain pollutant at its hygienic standard even slightly higher than the standard has zero or minor adverse effects. Actually, we may have a mistake. In fact, environmental toxin exposure is a multi-pollutants co-exposure system. The synergistic effects of pollutants co-exposure may lead to unexpected results.

This study investigated the impact of exposure to PM<sub>2.5</sub> or FA alone at hygienic standard or actually daily exposure level, as well as exposure to a mixture of PM<sub>2.5</sub>

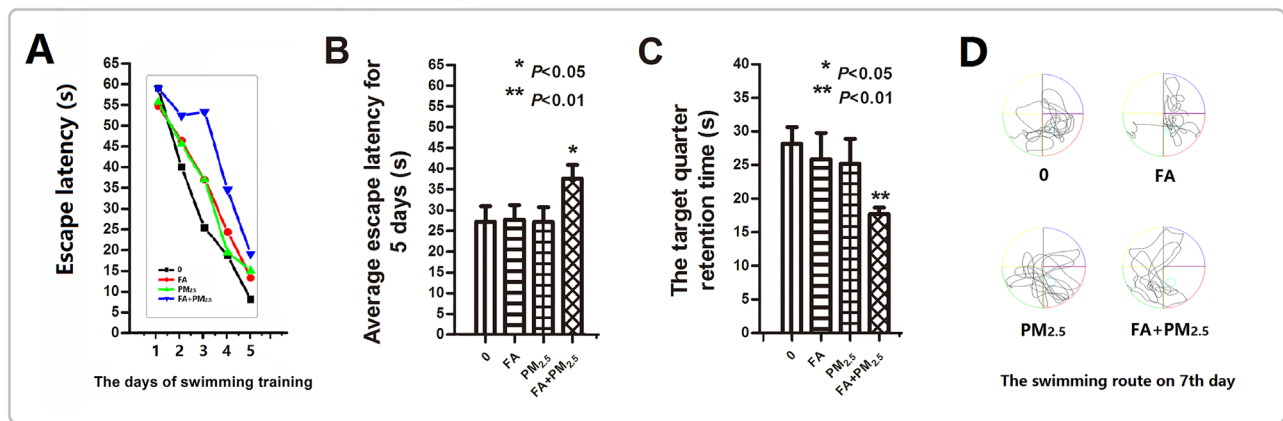

**Figure 1: Morris water maze test after exposure.** (A) The escape latency for the first 5 days. (B) The average escape latency for the first 5 days. (C) The time spent swimming in the platform quadrant on the seventh day. (D) The swimming route on the seventh day. \*P<0.05, \*\*P<0.01, compared with the control group.

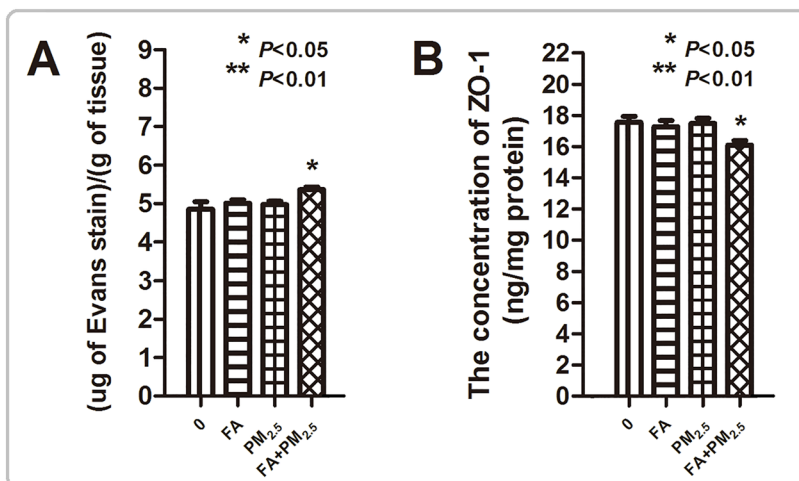

**Figure 2: Evaluation of BBB permeability.** (A) Evans Blue Assay. (B) The concentration of ZO-1 in the mouse brain after exposure. \*P<0.05, \*\*P<0.01, compared with the control group.

plus FA on AD-like pathology in experimental animals. The results confirmed that PM<sub>2.5</sub> or FA exposure alone had little or no effect on the mouse brain, however, co-exposure to PM<sub>2.5</sub> plus FA had a significant synergistic adverse effect.

Acquisition and maintenance of spatial memory after exposure was assessed using a MWM to observe any cognitive function decline. The test indicated that in this study although exposure to PM<sub>2.5</sub> or FA alone had no adverse effects on mice cognitive function, the co-exposure to PM<sub>2.5</sub> plus FA induced significant cognitive decline. To explore the reasons underlying these adverse effects, this study investigated the possibility of damage

to the internal brain structure. Some epidemiological and toxicological studies have confirmed that air pollution induced brain tissue damage in areas such as the BBB, the hippocampus, the olfactory bulb and the cortex, is similar to pathological symptoms of AD [10].

The results showed that after co-exposure, the permeability of the BBB deteriorated, structural changes in the hippocampus, olfactory bulb, cerebral cortex and prefrontal cortex were investigated. Hippocampus plays a critical role in spatial memory formation [11], and olfactory dysfunction also has a positive correlation with the risk of increasing cognitive decline [12, 13]. The histological observations of the

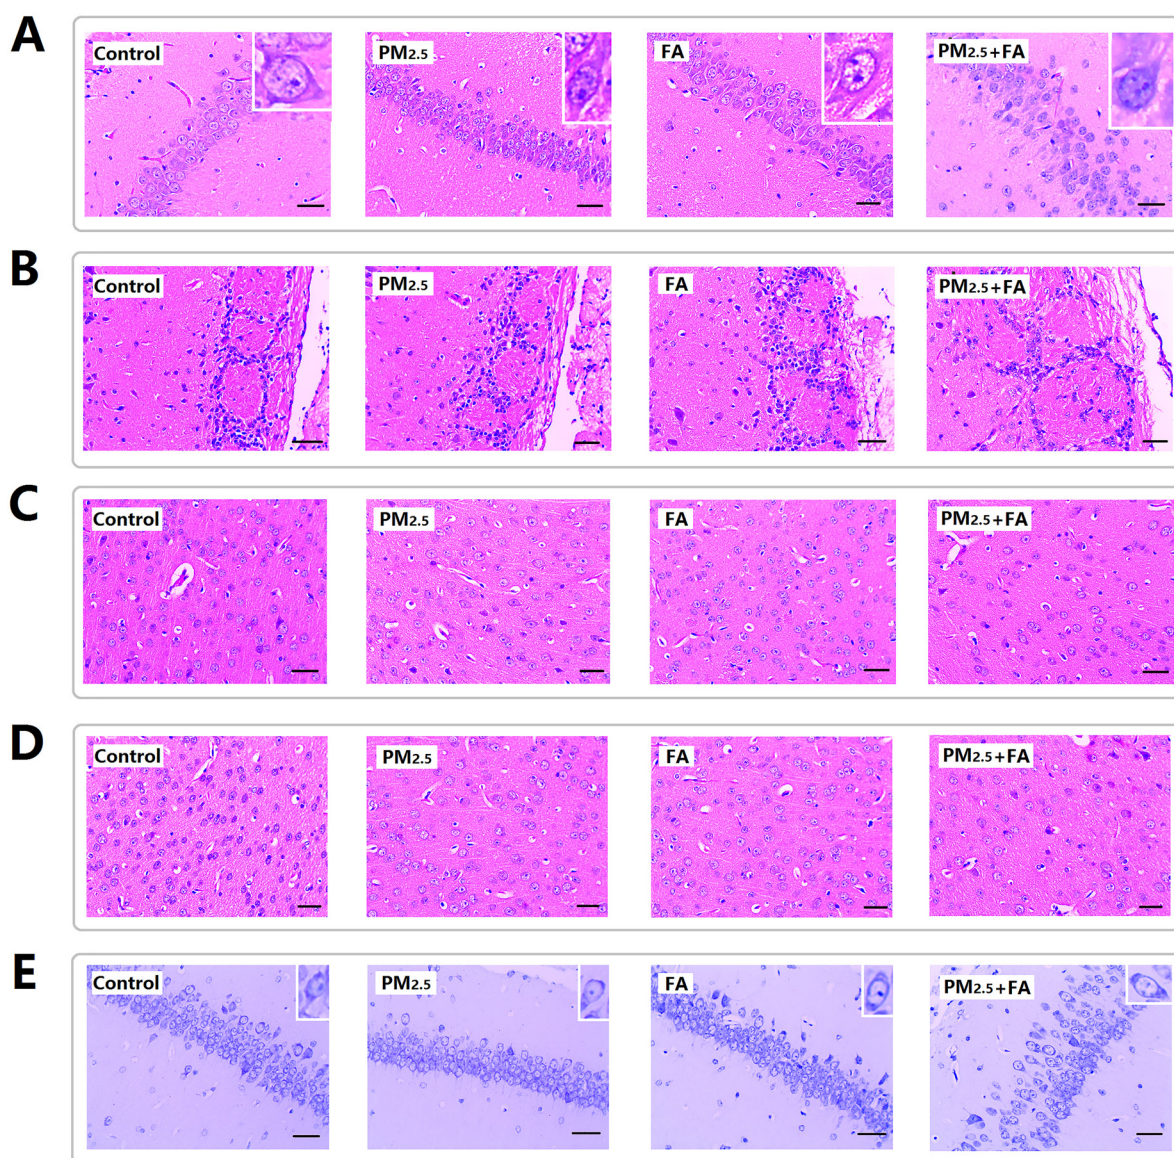

**Figure 3: Representative images (×400) of the hippocampus, olfactory bulb, cerebral cortex and prefrontal cortex after exposure. (A) H&E staining for hippocampus. (B) H&E staining for olfactory. (C) H&E staining for cerebral cortex. (D) H&E staining for prefrontal cortex. (E) Nissl staining for hippocampus. Scale=50μm.**

**Table 4: Cell number in cerebral cortex & prefrontal cortex**

| Group                 | Cerebral cortex       |           | Prefrontal cortex     |            |
|-----------------------|-----------------------|-----------|-----------------------|------------|
|                       | Cell number (Mean±SD) | P value   | Cell number (Mean±SD) | P value    |
| 0                     | 163.17±36.65          |           | 162.33±26.34          |            |
| PM <sub>2.5</sub>     | 152.33±19.43          | 0.5367    | 135.6±23.82           | 0.0329(*)  |
| FA                    | 165±22.23             | 0.9186    | 142.4±15.71           | 0.0586     |
| FA+ PM <sub>2.5</sub> | 119±19.9              | 0.0185(*) | 118.33±17.48          | 0.0007(**) |

\* $P < 0.05$ , \*\* $P < 0.01$ , compared with the control group.

**Table 5: The average optical density (OD) of Nissl staining**

| Group                 | Nissl staining |            |
|-----------------------|----------------|------------|
|                       | OD (Mean±SD)   | P value    |
| 0                     | 0.777±0.030    |            |
| PM <sub>2.5</sub>     | 0.787±0.041    | 0.664      |
| FA                    | 0.818±0.043    | 0.1174     |
| FA+ PM <sub>2.5</sub> | 0.678±0.037    | 0.0019(**) |

\*\* $P < 0.01$ , compared with the control group.

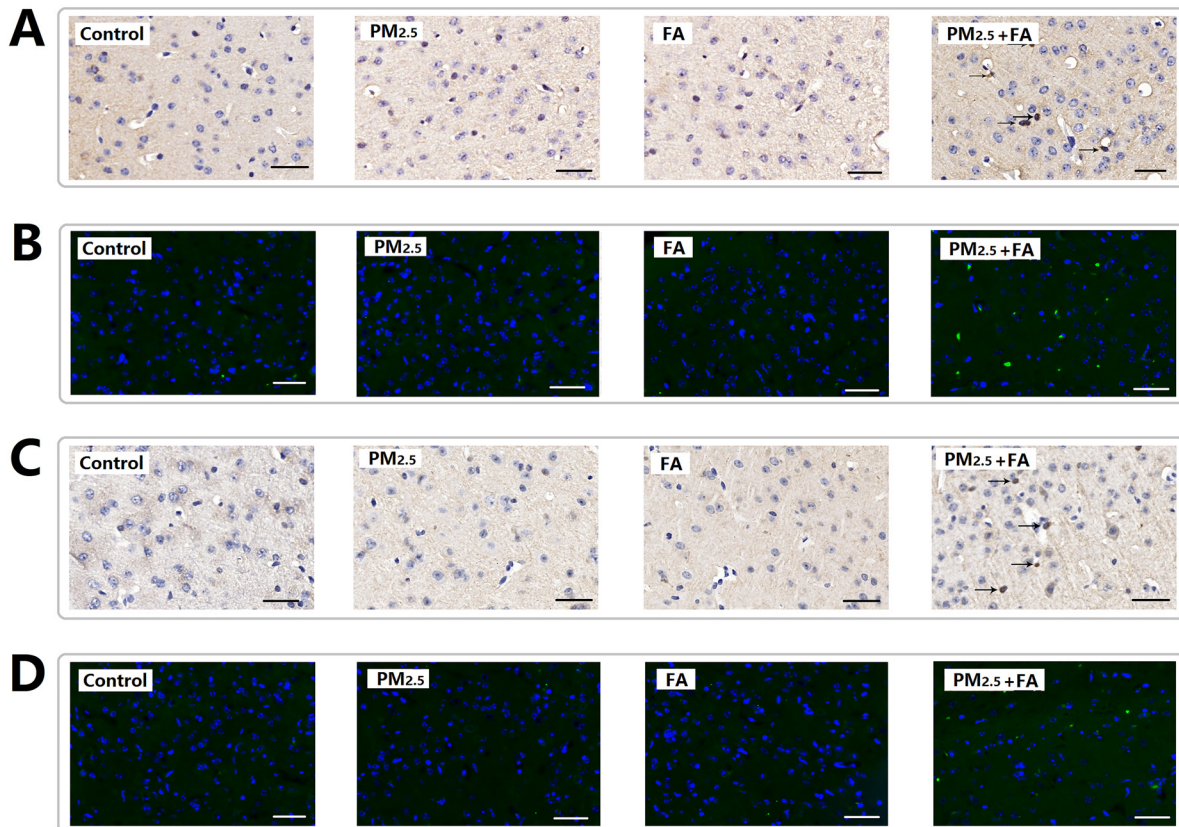

**Figure 4: Representative images (×400) of the expression of Aβ<sub>1-42</sub> and Tau-P as determined by immune-histochemical staining (brown color stain) and immunofluorescence. (A) Expression of Aβ<sub>1-42</sub> (HIS). (B) Expression of Aβ<sub>1-42</sub> (IF, green). (C) Expression of Tau-P (HIS). (D) Expression of Tau-P (IF, green). Nuclei were stained by DAPI reagents (blue). Scale=50μm.**

hippocampus and olfactory bulb demonstrated that PM<sub>2.5</sub> plus FA co-exposure induced pyramidal neurons of the hippocampus to be damaged, and the destruction of the structure of olfactory bulb. Additionally, chromatolysis (Nissl substance loss) in hippocampus and cell numbers decreased in cerebral and prefrontal cortex was demonstrated after co-exposure. All these

type of damage is a common pathological phenomenon in neurodegenerative diseases, and may affect neural signal transmission and memory formation, eventually contributing to cognitive function decline.

Abnormally high expression of A $\beta$ <sub>1-42</sub> and Tau-P destroy the stability of microtubules and axonal transport, eventually causing neuronal death, and inducing the

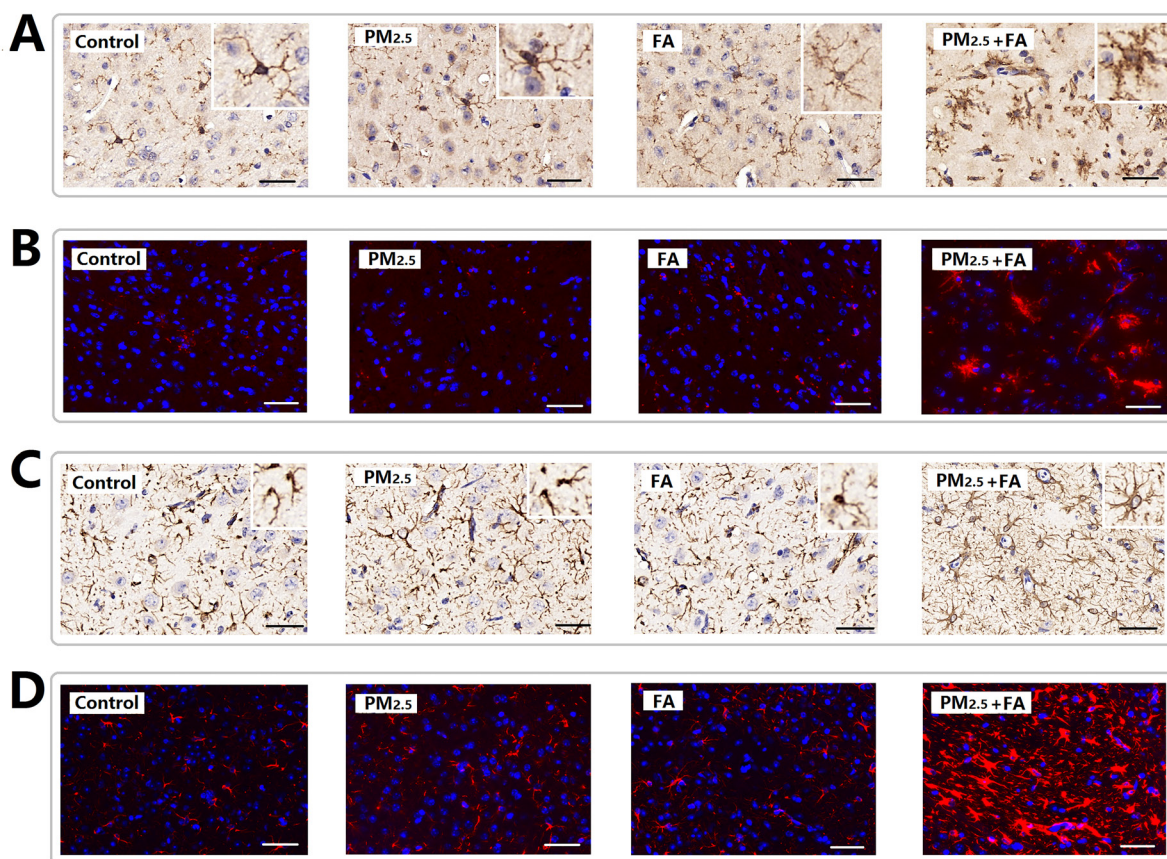

**Figure 5: Representative images ( $\times 400$ ) of the expression of Iba1 and GFAP as determined by immune-histochemical staining (brown color stain) and immunofluorescence. (A) Expression of Iba1 (HIS). (B) Expression of Iba1 (IF, red). (C) Expression of GFAP (HIS). (D) Expression of GFAP (IF, red). Nuclei were stained by DAPI reagents (blue). Scale=50 $\mu$ m.**

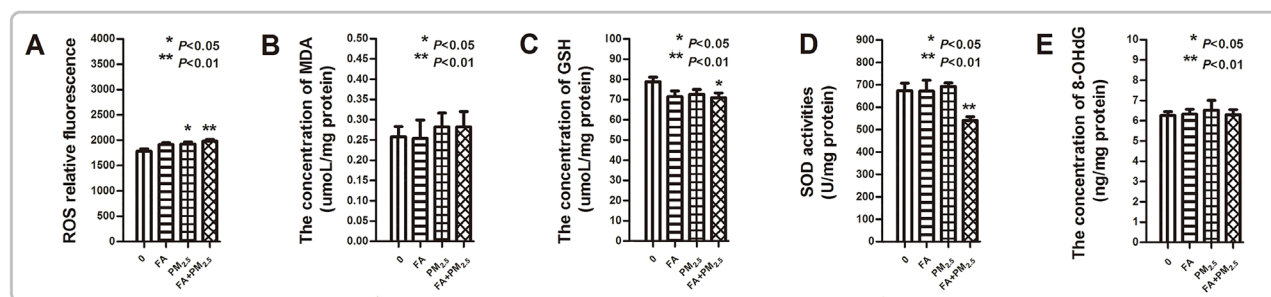

**Figure 6: The oxidative stress level after PM<sub>2.5</sub>, FA or multi-pollutant exposure. (A) The relative fluorescence of ROS in the mouse brain after exposure. (B) The concentration of MDA in the mouse brain after exposure. (C) The concentration of GSH in the mouse brain after exposure. (D) The SOD activity in the mouse brain after exposure. (E) The level of 8-OH-dG in the mouse brain after exposure. \*P<0.05, \*\*P<0.01, compared with the control group.**

occurrence of neurodegenerative diseases [14–16]. In this research,  $A\beta_{1-42}$  and Tau-P expression were induced by co-exposure. The abnormal expression of these proteins may be responsible for a decrease in neuron cell number in the cerebral cortex.

In order to explore the molecular mechanisms which lead to brain damage after exposure, some key upstream events were detected. According to some studies, OS and inflammation are part of the pathology of AD. One plausible mechanism is that OS and inflammation modifies the aggregation and fibrillation rate of proteins, and induces tau phosphorylation, potentially affecting AD etiology [6, 17, 18]. According to the results, the synergistic effect of co-exposure was detected in ROS accumulation, and GSH depletion and SOD activity decline. Following the hierarchical OS hypothesis, the effect of OS depends upon its degree. A high level OS will cause pro-inflammatory effects associated with diverse cellular activities [19]. This study showed the synergistic effect of co-exposure was reflected in the expression of COX-2.

In addition to understanding how ROS and cytokines accumulate after exposure, this study addressed some cell types that may be responsible for this. Hyperactive microglia can be found in response to endogenous disease proteins, inflammation cytokines, neuronal death, and environmental toxins [20]. ROS derived from activated microglia are crucial for neurotoxicity induced by toxins. Excess ROS re-induces inflammation, cell damage and disease protein accumulation [6]. The cycle of microglia activation causing accumulation of ROS results in neurotoxicity or the occurrence of disease. Astrocytes are essential abundant cells in the CNS, and are important for BBB integrity, the formation of synapses, the homeostasis of neurotransmitters, etc [6]. Activated astrocytes highly up-regulate many classical complementary cascade

genes previously shown to be destructive to synapses, and enhance the expression of some cytokines which can form a glial scar [21, 22]. In this study, Iba1 and GFAP were chosen as important markers of microglial and astrocyte activation. Consistent with the above results, after co-exposure, microglia and astrocytes were activated. While exposure to  $PM_{2.5}$  or FA alone did not enhance the expression of Iba1 and GFAP, the synergistic effect of co-exposure was significant. The increasingly activated microglia and astrocytes might be the main source of excess ROS and cytokines.

According to the results in this study,  $PM_{2.5}$  or FA alone at hygienic standard or actually daily exposure level had little or no damage on mice brain, while the co-exposure induced cognitive deficits, BBB damage, brain pathological alterations,  $A\beta_{1-42}$  and Tau-P accumulation, glia activation, OS and inflammation in mouse brain, which are common pathological phenomenon in AD.

In conclusion, this work suggests that one week of exposure to  $PM_{2.5}$  or FA alone at hygienic standard or actually daily exposure level resulted in little or no damage. However, mice are more likely to reflect AD-like pathologies after exposure to a combination of  $PM_{2.5}$  plus FA at these levels. These safe levels for alone exposure turned into dangerous at co-exposure. So, whether you still think that you are safe to expose pollutants at hygienic standards or actually daily exposure levels? You may have already received the injury through pollutants co-exposure. In the future, take synergistic effects of pollutants co-exposure into the process of making hygienic standard, the maximum allowable concentration of each pollutant may be lower. And further effort in prevention studies, such as how to defend against OS (eg. antioxidants) and inflammation (eg. nsaid) after exposure was stimulated (Figure 8).

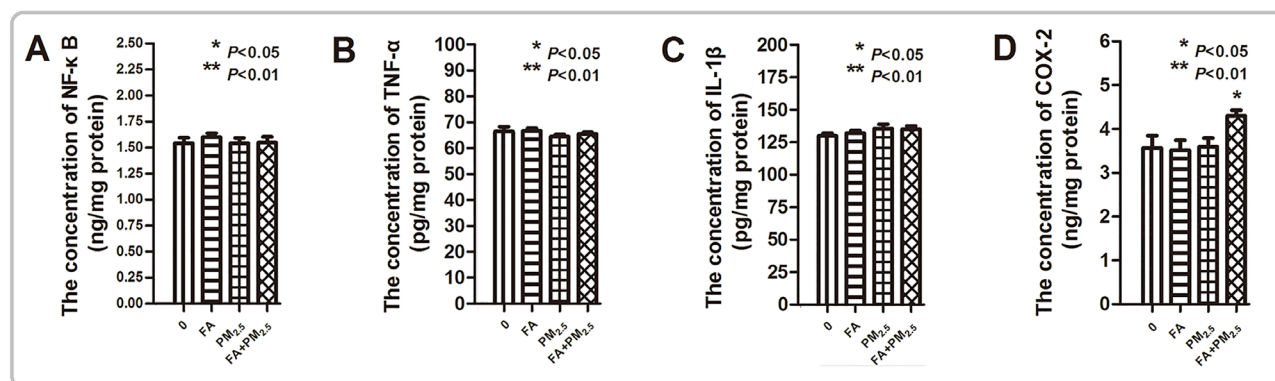

**Figure 7: The inflammation level after  $PM_{2.5}$ , FA or multi-pollutant exposure.** (A) The concentration of NF- $\kappa$ B in the mouse brain after exposure. (B) The concentration of TNF- $\alpha$  in the mouse brain after exposure. (C) The concentration of IL-1 $\beta$  in the mouse brain after exposure. (D) The concentration of COX-2 in the mouse brain after exposure. \* $P < 0.05$ , \*\* $P < 0.01$ , compared with the control group.



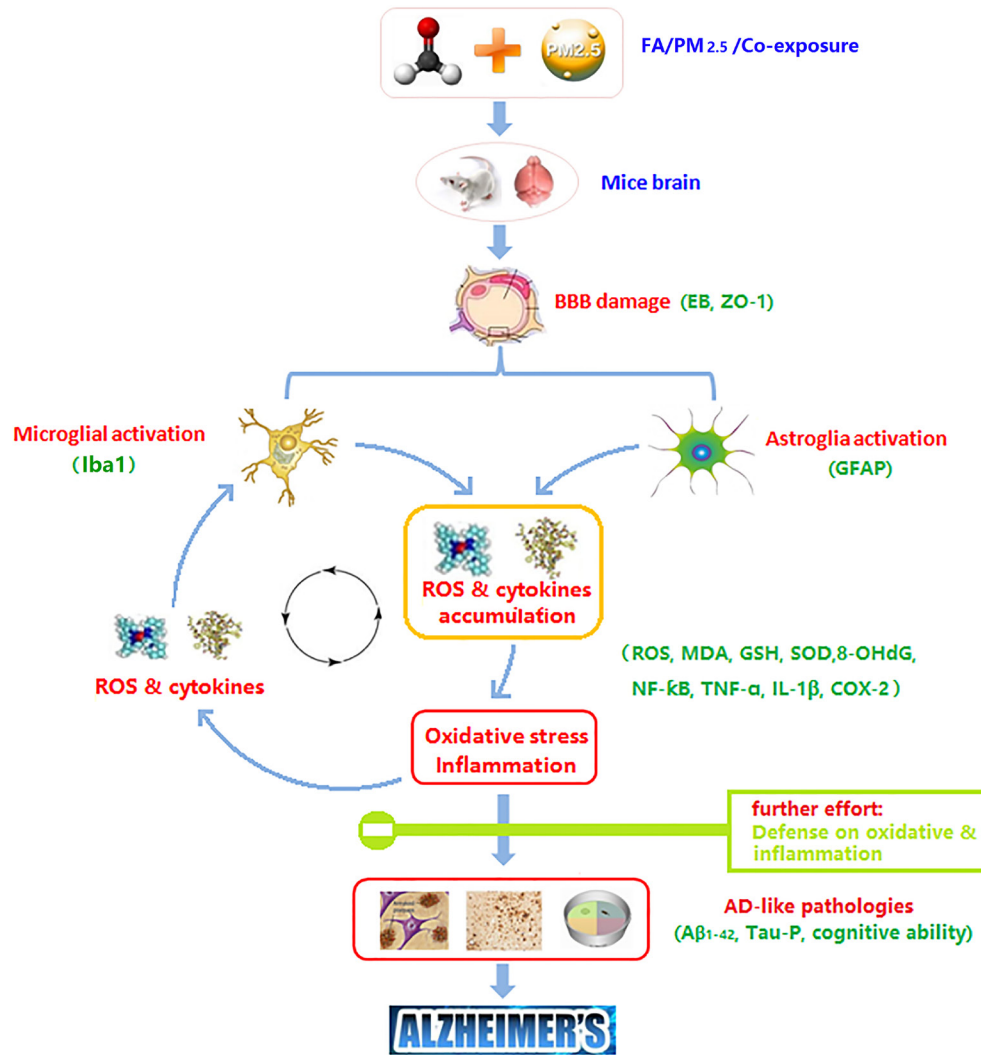

**Figure 8: Potential mechanism of PM<sub>2.5</sub>, FA or multi-pollutant exposure induced damage in the mouse brain.** Figure 8 was originally made by Xudong Liu.

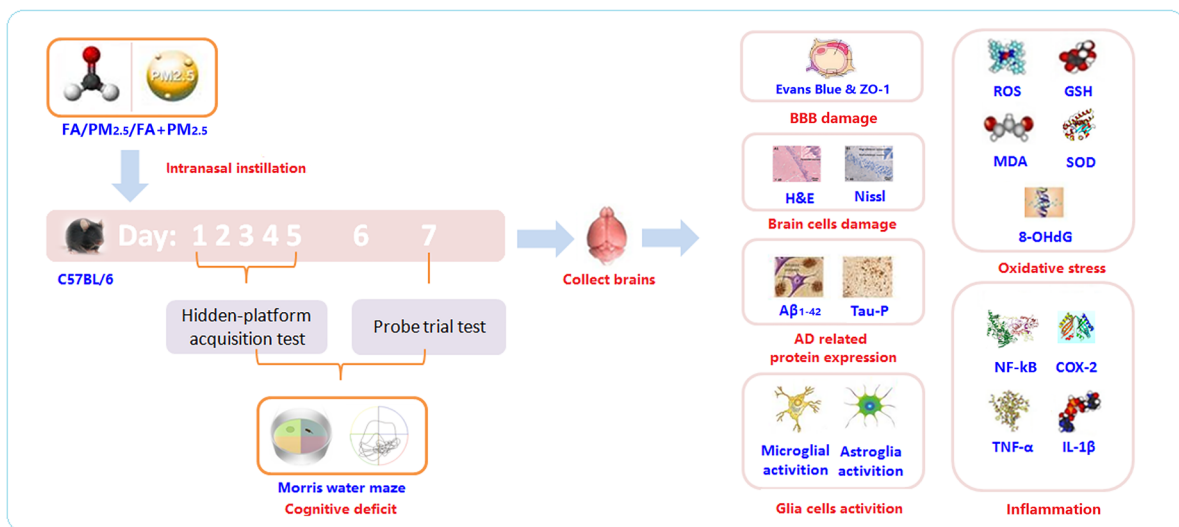

**Figure 9: The experimental protocol.**

**Table 6: The average optical density (OD) of A $\beta$ <sub>1-42</sub>, Tau-P, Iba1, GFAP immunohistochemical staining**

| Group                 | A $\beta$ <sub>1-42</sub>         |             | Tau-P                             |           |
|-----------------------|-----------------------------------|-------------|-----------------------------------|-----------|
|                       | OD (Mean $\pm$ SD)                | P value     | OD (Mean $\pm$ SD)                | P value   |
| 0                     | 0.0018 $\pm$ 1.520E <sup>-4</sup> |             | 0.0060 $\pm$ 0.0012               |           |
| PM <sub>2.5</sub>     | 0.0021 $\pm$ 2.746E <sup>-4</sup> | 0.0726      | 0.0063 $\pm$ 0.0021               | 0.8234    |
| FA                    | 0.0017 $\pm$ 2.547E <sup>-4</sup> | 0.4407      | 0.0063 $\pm$ 9.339E <sup>-4</sup> | 0.7455    |
| FA+ PM <sub>2.5</sub> | 0.0190 $\pm$ 0.0021               | <0.0001(**) | 0.0080 $\pm$ 9.368E <sup>-4</sup> | 0.0189(*) |

  

| Group                 | Iba1                              |            | GFAP                |           |
|-----------------------|-----------------------------------|------------|---------------------|-----------|
|                       | OD (Mean $\pm$ SD)                | P value    | OD (Mean $\pm$ SD)  | P value   |
| 0                     | 0.0010 $\pm$ 4.001E <sup>-4</sup> |            | 0.0502 $\pm$ 0.0107 |           |
| PM <sub>2.5</sub>     | 0.0010 $\pm$ 2.251E <sup>-4</sup> | 0.8761     | 0.0538 $\pm$ 0.0103 | 0.6035    |
| FA                    | 0.0011 $\pm$ 4.907E <sup>-4</sup> | 0.6101     | 0.0543 $\pm$ 0.0100 | 0.5464    |
| FA+ PM <sub>2.5</sub> | 0.0108 $\pm$ 0.0048               | 0.0018(**) | 0.0633 $\pm$ 0.0054 | 0.0405(*) |

\* $P$ <0.05, \*\* $P$ <0.01, compared with the control group.

## MATERIALS AND METHODS

### Animals

Specified pathogen-free class (SPF) Male C57BL/6J mice (6 weeks old, 22 $\pm$ 2g) were supplied by the Hubei Province Experimental Animal Center (Wuhan, China). All mice were maintained in pathogen-free cages at 20-25 °C temperature with 50-70% humidity and a 12 h light/dark cycle. All mice were provided with a commercial diet and filtered water *ad libitum*.

All experimental procedures were approved by Office of Scientific Research Management of Central Normal University (Wuhan, China). Animal experiments were conducted under the National Institutes of Health Guide for the Care and Use of Laboratory Animals, with a certificate of Application for the Use of Animals dated 20 December, 2015 (approval ID: CCNU-IACUC-2016-003).

### Collection of PM<sub>2.5</sub>

A high traffic, total suspended particulates (TSP), sampler (KC-1000, Qingdao) was used to collect ambient air composed of PM<2.5 $\mu$ m (fine/ultrafine; F/UF) in Wuhan, China. The collected PM<sub>2.5</sub> glass filter membranes were cut into small pieces, processed ultrasonically in ultrapure water for 40 min, after which the filter membranes were thrown away. The extracted liquid was vacuum freeze dried and cryogenically preserved. Before the experiment, the freeze-dried particulate matter was mixed with normal saline to get a particle suspension, which was then subjected to ultrasonic oscillation for 15 min, ensuring that the suspension was uniform and sterile.

### Analysis of components in the PM<sub>2.5</sub>

The elements in the samples were analyzed by inductively coupled plasma atomic emission spectroscopy (ICP-AES, 61E Trace and ICP-750, Thermo Jarrell-Ash, MA) after acid digestion with mixed acids (68% nitric, 38% hydrofluoric, and 70% perchloric = 5:1:1) was performed at 180 °C for 3 h. The water soluble components in the samples were analyzed using an ion chromatograph (DX-100, Dionex, Sunnyvale, CA) and ICP-AES (61E Trace, Thermo Jarrell-Ash). Polycyclic Aromatic Hydrocarbons (PAHs) were analyzed according to a previously reported method [23].

### Preparation of exposure pollutants

#### Preparation of FA

According to the “Hygienic standard for formaldehyde in the indoor air of a house (GB/T 16127-1995)” in China, the upper limit for an acceptable concentration of FA in indoor air is 0.08 mg/m<sup>3</sup>. The tidal volume of a human is roughly 15 m<sup>3</sup>/day [24], so the exposure dose of FA at the maximum permissible concentration is 0.08 mg/m<sup>3</sup> $\times$ 15m<sup>3</sup>/day =1.2 mg/day. By converting the exposure dosage to mice [25], so that the exposure dosage for mice is equivalent to that experienced by humans, got 0.155 mg/Kg/day. The exposure FA is prepared from formalin and the volume of intranasal instillation is 10  $\mu$ L.

#### Preparation of PM<sub>2.5</sub>

It is a pity that there is no hygienic standard for indoor PM<sub>2.5</sub> in China. According to some studies, for

example, in Beijing, Shanghai, Wuhan, Chongqing and Nanchang, the indoor PM<sub>2.5</sub> concentrations were measured at 85, 142, 92, 211, 103 µg/m<sup>3</sup> during the test period, respectively [25]. Using these measured concentrations as a guide, 100 µg/m<sup>3</sup> were used as the exposure dosage in this study. Converting this exposure dosage to mice results in an exposure of 0.193 mg/Kg/day for the mice. The exposure PM<sub>2.5</sub> is dissolved in normal saline and the volume of intranasal instillation is 10 µL.

### Preparation of the multi-pollutant

In this study, the co-exposure dosage of the multi-pollutant is 0.155 mg/Kg/day FA plus 0.193 mg/Kg/day PM<sub>2.5</sub>. The volume of intranasal instillation is 10 µL.

### Experimental protocol

Mice divided randomly into 4 groups, were exposed (intranasal instillation) daily to 0, PM<sub>2.5</sub>, FA or the multi-pollutant for 7 days. Throughout the exposure period, the Morris Water Maze (MWM) was performed to evaluate the cognitive ability of the mice after exposure. After the MWM, some pathological hallmarks of AD and some key upstream events were investigated (Figure 9).

### Morris water maze (MWM)

Acquisition and maintenance of spatial memory by the trained rats was assessed by using a MWM test as described previously [26, 27]. The maze was a 100 cm diameter pool, filled with water to a depth of 20 cm. The water was kept at room temperature. The pool was divided into four quadrants (N, E, S, W quadrants) and the platform was placed 1 cm below the water surface, in the center of the SE quadrant. A camera recorded the tracks of mice over the pool. In this study, the training continued from the first to the fifth day. The mice were put into the pool from the center of the NE, NW and SW quadrants, each mouse trained three times each day. The time that the mice spend looking for the platform is termed "EL". EL was measured to reflect the spatial memory acquisition ability of mice. If a mouse failed to find the platform within 60s, the EL was recorded as 60s. Then guided the mouse to the platform and kept it there for 30s so it could learn (hidden-platform acquisition test for the first five days). On the sixth day, no MWM was performed (forgetting-period), but on the seventh day the MWM was performed again, but with no platform in the pool. In this case, the mice were also put into the pool from the center of the NE, NW and SW quadrants and forced to swim for 60s. During this period, the swimming tracks were recorded by camera. The swimming time spent in the SE quadrant (where the platform was previously) reflects the spatial memory ability of the mice after exposure (probe trial test on the seventh day).

### Evaluation of BBB permeability

24 hours after the final intranasal instillation, a 0.5% solution of EB in normal saline was injected intravenously. The stain was allowed to circulate for 1 hour, after which the mouse brain was collected, and the EB content in the mouse brain was measured as previously described [28]. An ELISA kit (BlueGene Biotech Company, Shanghai, China) was used to measure the ZO-1 concentration in the brain. The kit was used according to the manufacturer's instructions.

### Histological examination

Brain samples were sectioned into slices for hematoxylin and eosin (H&E)- and nissl-staining as previously described [29]. The number of cells in each of the slices from the cerebral cortex and the prefrontal cortex were counted, and the average optical density (OD) of each nissl-stained slice was tested by software (Image-Pro Plus 6.0, Media Cybernetics, Bethesda, MD, USA).

### Immunohistochemistry for GFAP, Iba1, Aβ<sub>1-42</sub> and Tau-P

Brain sections were incubated with diluted primary antibodies (rabbit anti-GFAP, Iba1, Aβ<sub>1-42</sub>, Tau-P antibody, 1:200 dilution). Then antibody binding was detected by biotinylated immunoglobulins and avidin-biotin peroxidase complex as previously described [30]. Immunostained sections were observed under a DM 4000B microscope. Image-Pro Plus 6.0 software was used to evaluate the staining intensity OD.

### Immunofluorescence for GFAP, Iba1, Aβ<sub>1-42</sub> and Tau-P

Brain sections were blocked with 5% bovine serum albumin (BSA) for 30 min and incubated with anti-paxillin antibody or anti-phosphotyrosine antibody at 4 °C overnight. Subsequently, brain sections were washed and incubated with Cy-3-conjugated or FITC-conjugated secondary antibody at 37 °C for 60 min, washed again, mounted, and examined under a fluorescence microscope. The cells were also counterstained with DAPI for nuclear staining. Fluorescence images were captured using a Leica Qwin V3 (Leica Microsystems).

### Brain sample homogenate

Mice brains were collected and weighed. The brain sample homogenate was made as previously described [28].

### Assessment of ROS, MDA and GSH

The ROS, MDA and GSH content of the mouse brain was measured using 2',7'-dichlorofluorescein

diacetate (DCFH-DA), 2-thiobarbituric acid (TBA), and 3-carboxy-4-nitrophenyl disulfide (DTNB) respectively, as previously described [28].

### Analysis of SOD activity

SOD activity was determined using a SOD assay kit (Jiancheng, Nanjing, Jiangsu, China). The kit was used following instructions provided by the manufacturer.

### Detection of 8-OH-dG content

An ELISA kit (R&D System, Minneapolis, MN, USA) was used to measure the 8-OH-dG concentration in the brain supernatant according to the manufacturer's instructions. The sensitivities of the ELISA kit was 0.1 ng/mL.

### Analysis of NF- $\kappa$ B, TNF- $\alpha$ , IL-1 $\beta$ and COX-2 content

ELISA kits provided by eBioscience (eBioscience, San Diego, CA, USA) were used to measure the concentrations of NF- $\kappa$ B, TNF- $\alpha$ , IL-1 $\beta$ . And kit supplied through BlueGene (BlueGene Biotech Company, Shanghai, China) was used to detect the content of COX-2. All kits were used according to the directions provided by the manufacturers. The sensitivities of the ELISA kits were 0.1 ng/mL for NF- $\kappa$ B and COX-2, 8 pg/mL for TNF- $\alpha$ , and 80 pg/mL for IL-1 $\beta$ .

### Statistical analyses

Data were presented as the mean  $\pm$  standard error (SE). Repeated ANOVAs combined with a post hoc Tukey test were used for the first 5 day's average escape latency analyses in the MWM to determine whether there was any significant difference between groups. All other data collected were analyzed by a one-way ANOVA followed by a Tukey test. Values of  $p < 0.05$  were considered statistically significant. Data analyses were carried out using SPSS 13.0 (Chicago, IL, USA) and generated statistical graphs using GraphPad Prism 5.0 (San Diego, CA, USA).

### Abbreviations

AD: Alzheimer's disease; PM<sub>2.5</sub>: ambient fine particles; FA: formaldehyde; A $\beta$ : beta-amyloid plaques; Tau-P: hyper-phosphorylated tau; PM: particulate matter; SPF: specified pathogen-free; EC: element carbon; OC: organic carbon; TSP: total suspended particulates; F/UF: fine/ultrafine; MWM: Morris water maze; NE: northeast; SE: southeast; NW: northwest; SW: southwest; EL: escape latency; BBB: blood-brain barrier; EB: Evans Blue; ZO-1: Zonula occludens-1; A $\beta$ <sub>1-42</sub>: beta-amyloid plaques 1-42;

Tau-P: hyper-phosphorylated tau; H&E: hematoxylin and eosin; OS: oxidative stress; OD: average optical density; GFAP: glial fibrillary acidic protein; DAB: diaminobenzidine; PBS: phosphate-buffered saline; ROS: reactive oxygen species; MDA: malondialdehyde; GSH: glutathione; DCFH-DA: 2',7'-dichlorofluorescein diacetate, TBA: 2-thiobarbituric acid; DTNB: 3-carboxy-4-nitrophenyl disulfide; SOD: superoxide dismutase; 8-OH-dG: 8-hydroxy-2-deoxyguanosine; COX-2: cyclooxygenase 2; NF- $\kappa$ B: nuclear factor  $\kappa$ B; TNF- $\alpha$ : tumor necrosis factor  $\alpha$ ; IL-1 $\beta$ : interleukin-1 $\beta$ ; SE: standard error

### Author contributions

All authors conceived and designed the experiments. Performed the experiments: Xudong Liu, Yuchao Zhang, Jun Kang, Cheng Luo. Analyzed the data: Xudong Liu, Jun Kang, Cheng Luo, Kun Wang, Xu Yang. Contributed reagents/materials/analysis tools: Jinquan Li, Ping Ma, Xu Yang. Wrote the manuscript: Xudong Liu, Yuchao Zhang, Jun Kang, Cheng Luo, Jinquan Li, Ping Ma, Kun Wang, Xu Yang.

### ACKNOWLEDGMENTS

We gratefully acknowledge Susan Olivier for editing the manuscript.

### CONFLICTS OF INTEREST

The authors declare that they have no competing interests.

### FUNDING

This work was supported by the National Nature Science Foundation of China (21577045); Hubei Province Health and Family Planning Scientific Research Project (WJ2017Z027).

### REFERENCES

1. Akhter H, Ballinger C, Liu N, van Groen T, Postlethwait EM, Liu RM. Cyclic ozone exposure induces gender-dependent neuropathology and memory decline in an animal model of Alzheimer's disease. *Toxicol Sci.* 2015; 147:222-234.
2. Calderón-Garcidueñas L, Reed W, Maronpot RR, Henríquez-Roldán C, Delgado-Chavez R, Calderón-Garcidueñas A, Dragustinovis I, Franco-Lira M, Aragón-Flores M, Solt AC, Altenburg M, Torres-Jardón R, Swenberg JA. Brain inflammation and Alzheimer's-like pathology in individuals exposed to severe air pollution. *Toxicol Pathol.* 2004; 32:650-658.

3. Kawahara M, Kato-Negishi M. Link between aluminum and the pathogenesis of Alzheimer's disease: the integration of the aluminum and amyloid cascade hypotheses. *Int J Alzheimers Dis.* 2011; 2011: 276393.
4. Singh S, Li SS. Epigenetic effects of environmental chemicals bisphenol A and phthalates. *Int J Mol Sci.* 2012; 13:10143-10153.
5. Ballard C, Gauthier S, Corbett A, Brayne C, Aarsland D, Jones E. Alzheimer's disease. *Lancet.* 2011; 377:1019-1031.
6. Block ML, Calderón-Garcidueñas L. Air pollution: mechanisms of neuroinflammation and CNS disease. *Trends Neurosci.* 2009; 32:506-516.
7. Underwood E. The polluted brain. *Science.* 2017; 355:342-345.
8. China Society for Urban Studies. *China Green Building 2016.* China Architecture & Building Press. 2016; p:74-88.
9. Marques G, Pitarma R. An indoor monitoring system for ambient assisted living based on Internet of things architecture. *Int J Environ Res Public Health.* 2016; 13.
10. Moulton PV, Yang W. Air pollution, oxidative stress, and Alzheimer's disease. *J Environ Public Health.* 2012; 2012:472751.
11. Zola-Morgan S, Squire LR, Amaral DG. Human amnesia and the medial temporal region: enduring memory impairment following a bilateral lesion limited to field CA<sub>1</sub> of the hippocampus. *J Neurosci.* 1986; 6:2950-2967.
12. Arnold SE, Lee EB, Moberg PJ, Stutzbach L, Kazi H, Han LY, Han LY, Lee VM, Trojanowski JQ. Olfactory epithelium amyloid-beta and paired helical filament-tau pathology in Alzheimer disease. *Ann Neurol.* 2010; 67:462-469.
13. Doty RL. The olfactory vector hypothesis of neurodegenerative disease: is it viable? *Ann Neurol.* 2008; 63:7-15.
14. Bhatt DP, Puig KL, Gorr MW, Wold LE, Combs CK. A pilot study to assess effects of long-term inhalation of airborne particulate matter on early Alzheimer-like changes in the mouse brain. *PLoS One.* 2015; 10:e0127102.
15. Alonso Adel C, Li B, Grundke-Iqbal I, Iqbal K. Polymerization of hyperphosphorylated tau into filaments eliminates its inhibitory activity. *Proc Natl Acad Sci U S A.* 2006; 103:8864-8869.
16. Calderón-Garcidueñas L, Solt AC, Henríquez-Roldán C, Torres-Jardón R, Nuse B, Herritt L, Villarreal-Calderón R, Osnaya N, Stone I, García R, Brooks DM, González-Maciel A, Reynoso-Robles R. Long-term air pollution exposure is associated with neuroinflammation, an altered innate immune response, disruption of the blood-brain barrier, ultrafine particulate deposition, and accumulation of amyloid beta-42 and alpha-synuclein in children and young adults. *Toxicol Pathol.* 2008; 36: 289-310.
17. Liu L, Komatsu H, Murray IV, Axelsen PH. Promotion of amyloid beta protein misfolding and fibrillogenesis by a lipid oxidation product. *J Mol Biol.* 2008; 377:1236-1250.
18. Liu ZC, Chu J, Lin L, Song J, Ning LN, Luo HB, Yang SS, Shi Y, Wang Q, Qu N, Zhang Q, Wang JZ, Tian Q. SIL1 rescued bip elevation-related tau hyperphosphorylation in ER stress. *Mol Neurobiol.* 2016; 53:983-994.
19. Xiao GG, Wang M, Li N, Loo JA, Nel AE. Use of proteomics to demonstrate a hierarchical oxidative stress response to diesel exhaust particle chemicals in a macrophage cell line. *J Biol Chem.* 2003; 278: 50781-50790.
20. Block ML, Zecca L, Hong JS. Microglia-mediated neurotoxicity: uncovering the molecular mechanisms. *Nat Rev Neurosci.* 2007; 8:57-69.
21. Zhou NB, Fu ZJ, Sun T. Effects of different concentrations of oxygen-ozone on rats' astrocytes *in vitro*. *Neurosci Lett.* 2008; 441:178-182.
22. Liddel SA, Guttenplan KA, Clarke LE, Bennett FC, Bohlen CJ, Schirmer L, Bennett ML, Münch AE, Chung WS, Peterson TC, Wilton DK, Frouin A, Napier BA, et al. Neurotoxic reactive astrocytes are induced by activated microglia. *Nature.* 2017; 541:481-487.
23. He M, Ichinose T, Kobayashi M, Arashidani K, Yoshida S, Nishikawa M, Takano H, Sun G, Shibamoto T. Differences in allergic inflammatory responses between urban PM<sub>2.5</sub> and fine particle derived from desert-dust in murine lungs. *Toxicol Appl Pharmacol.* 2016; 297:41-55.
24. Wang F, Zuo MX. *Human and Animal Physiology.* Higher Education Press. 2001; p:254-255.
25. Li C. *Replication of Animal Models for Human Diseases.* People's Medical Publishing House (China). 2008; p:57-62.
26. Morris R. Developments of a water-maze procedure for studying spatial learning in the rat. *J Neurosci Methods.* 1984; 11:47-60.
27. Tong Z, Han C, Qiang M, Wang W, Lv J, Zhang S, Luo W, Li H, Luo H, Zhou J, Wu B, Su T, Yang X, et al. Age-related formaldehyde interferes with DNA methyltransferase function, causing memory loss in Alzheimer's disease. *Neurobiol Aging.* 2015; 36:100-110.
28. Manaenko A, Chen H, Kammer J, Zhang JH, Tang J. Comparison Evans blue injection routes: intravenous versus intraperitoneal, for measurement of blood-brain barrier in a mice hemorrhage model. *J Neurosci Methods.* 2011; 195:206-210.
29. Liu XD, Zhang YC, Li JQ, Wang D, Wu Y, Li Y, Lu Z, Yu SC, Li R, Yang X. Cognitive deficits and decreased locomotor activity induced by single-walled carbon nanotubes and neuroprotective effects of ascorbic acid. *Int J Nanomedicine.* 2014; 9:823-839.
30. Wu Y, You H, Ma P, Li L, Yuan Y, Li J, Ye X, Liu X, Yao H, Chen R, Lai K, Yang X. Role of transient receptor potential ion channels and evoked levels of neuropeptides in a formaldehyde-induced model of asthma in BALB/c mice. *PLoS One.* 2013; 8:e62827.
